# Supplementary material for: Advances in HIV Gene Therapy
Source: MDPI journal article supplement (doi:10.3390/ijms25052771), 2024-02-28
Supplement: s1 [file s1]

## SUPPLEMENTARY INFORMATION: Advances in HIV Gene Therapy

**Table S1: List of Approved CAR-T and Gene Products**

| Type of Cell/ Gene Therapy            |      | DRUG NAME (Year of Approval)                    | VECTOR/ MODE OF ACTION                                                                         | INDICATION                                                                                                                                                                                                                                                 | COMPANY. Ref.                                                                                                                                              |
|---------------------------------------|------|-------------------------------------------------|------------------------------------------------------------------------------------------------|------------------------------------------------------------------------------------------------------------------------------------------------------------------------------------------------------------------------------------------------------------|------------------------------------------------------------------------------------------------------------------------------------------------------------|
| CAR-T Therapies                       | Cell | ABECMA<br>idecabtagene vicleucel<br>(2021)      | B-cell maturation antigen (BCMA)-directed genetically modified autologous T cell immunotherapy | Adult patients with relapsed or refractory multiple myeloma after 4 or more prior lines of therapy including an immunomodulatory agent, a proteasome inhibitor, and an anti-CD38 monoclonal antibody.                                                      | Celgene Corporation (Bristol-Myers Squibb Company)<br><a href="https://www.abecma.com/">https://www.abecma.com/</a><br>[1]                                 |
|                                       |      | CARVYKTI<br>ciltacabtagene autoleucel<br>(2022) | BCMA-directed genetically modified autologous T cell immunotherapy                             | Adult patients with relapsed or refractory multiple myeloma after 4 or more prior lines of therapy, including a proteasome inhibitor, an immunomodulatory agent, and an anti-CD38 monoclonal antibody                                                      | Janssen Biotech, Inc.<br><a href="https://www.carvykti.com/">https://www.carvykti.com/</a><br>[2]                                                          |
|                                       |      | BREYANZI,<br>lisocabtagene maraleucel<br>(2021) | CD19-directed genetically modified autologous T cell immunotherapy                             | Adult patients with large B-cell lymphoma (LBCL), including diffuse large B-cell lymphoma (DLBCL) not otherwise specified, high-grade B-cell lymphoma, primary mediastinal large B-cell lymphoma, and follicular lymphoma grade 3B with refractory disease | Juno Therapeutics, Inc., Bristol-Myers Squibb Company<br><a href="https://www.breyanzi.com/">https://www.breyanzi.com/</a><br>[3]                          |
|                                       |      | KYMRIAH<br>tisagenlecleucel<br>(2017)           | CD19-directed genetically modified autologous T cell immunotherapy                             | Adult patients with relapsed or refractory follicular lymphoma after two or more lines of therapy                                                                                                                                                          | Novartis Pharmaceuticals Corporation<br><a href="https://www.hcp.novartis.com/products/kymriah/">https://www.hcp.novartis.com/products/kymriah/</a><br>[4] |
|                                       |      | TECARTUS<br>brexucabtagene autoleucel<br>(2020) | CD19-directed genetically modified autologous T cell immunotherapy                             | Adult patients with relapsed or refractory mantle cell lymphoma (MCL) and patients with relapsed or refractory (r/r) B-cell precursor acute lymphoblastic leukemia (ALL)                                                                                   | Kite Pharma, Inc<br><a href="https://www.tecartus.com/">https://www.tecartus.com/</a><br>[5]                                                               |
|                                       |      | YESCARTA<br>axicabtagene ciloleucel<br>(2017)   | CD19-directed genetically modified autologous T cell immunotherapy                             | Adult patients with large B-cell lymphoma that is refractory to first-line chemotherapy or that relapses within 12 months of first-line chemotherapy.                                                                                                      | Kite Pharma, Inc<br><a href="https://www.yescarta.com/">https://www.yescarta.com/</a><br>[6]                                                               |
| Autologous Therapy                    | Cell | PROVENGE<br>sipuleucel-T<br>(2010)              | Autologous cellular immunotherapy                                                              | For treatment of asymptomatic or minimally symptomatic metastatic castrate resistant (hormone refractory) prostate cancer.                                                                                                                                 | Dendreon Corporation<br><a href="https://provenge.com/">https://provenge.com/</a><br>[7]                                                                   |
| Single Stranded Oligonucleotide (SSO) | Cell | DEFITELIO<br>Defibrotide<br>(2016)              | Single stranded oligonucleotide given intravenously                                            | Treatment of severe hepatic veno-occlusive disease, with renal or pulmonary dysfunction following hematopoietic stem cell (HSC) transplantation                                                                                                            | Jazz Pharmaceuticals<br><a href="https://www.defitelio.com/">https://www.defitelio.com/</a><br>[8, 9]                                                      |

| Type of Cell/ Gene Therapy                                   | DRUG NAME (Year of Approval)                    | VECTOR/ MODE OF ACTION                                                                                                                        | INDICATION                                                                                                                                                                                                                                                                                                  | COMPANY. Ref.                                                                                                                      |
|--------------------------------------------------------------|-------------------------------------------------|-----------------------------------------------------------------------------------------------------------------------------------------------|-------------------------------------------------------------------------------------------------------------------------------------------------------------------------------------------------------------------------------------------------------------------------------------------------------------|------------------------------------------------------------------------------------------------------------------------------------|
| Antisense Oligonucleotides (ASO)                             | EXONDYS 51 Eteplirsen (US FDA, 2016)            | Antisense oligonucleotide that causes skipping of Exon 51 given by intravenous infusion                                                       | For treating patients with Duchenne muscular dystrophy (DMD)                                                                                                                                                                                                                                                | Sarepta Therapeutics <a href="https://www.exondys51.com/">https://www.exondys51.com/</a> [10]                                      |
|                                                              | KYNAMRO Mipomersen 2013 US FDA. Rejected by EMA | 2 <sup>nd</sup> generation antisense oligonucleotide administered subcutaneously                                                              | Used to treat homozygous familial hypercholesterolemia by blocking the production of apolipoprotein B, the main component of LDL cholesterol                                                                                                                                                                | Ionis Pharmaceuticals [11]                                                                                                         |
|                                                              | SPINRAZA nusinersen (2016 US FDA)               | anti-sense oligonucleotide that enables SMN2 gene to produce full length protein. Administered intrathecally                                  | For the treatment 5q spinal muscular atrophy (SMA)                                                                                                                                                                                                                                                          | Ionis Pharmaceuticals and Cold Spring Harbor Laboratory <a href="https://www.spinraza.com/">https://www.spinraza.com/</a> [12, 13] |
|                                                              | MACUGEN Pegaptanib sodium (US FDA 2004)         | Pegylated aptamer administered in vivo (intravitreal)                                                                                         | For the treatment of neovascular (wet) age-related macular degeneration (AMD)                                                                                                                                                                                                                               | NeXstar Pharmaceuticals [14]                                                                                                       |
| Plasmid DNA                                                  | NEOVASCULGEN Cambiogeneplasmid (Russia, 2011)   | Plasmid DNA encoding the 165-amino-acid isoform of human vascular endothelial growth factor (pCMV - VEGF165); intraneural injection (in vivo) | For peripheral artery disease, including peripheral limb ischemia                                                                                                                                                                                                                                           | Human Stem Cells Institute, Russia [15]                                                                                            |
| Genetically modified Herpes Simplex Type 1 (Oncolytic Virus) | IMLYGIC talimogene laherparepvec (2015)         | Genetically modified oncolytic viral therapy designed to replicate within tumors and to produce the immune stimulatory protein GM-CSF         | For the local treatment of unresectable cutaneous, subcutaneous, and nodal lesions in patients with melanoma recurrent after initial surgery. It causes lysis of tumors, followed by release of tumor-derived antigens, which together with virally derived GM-CSF may promote an antitumor immune response | BioVex, Inc., a subsidiary of Amgen Inc. <a href="https://www.imlygic.com/">https://www.imlygic.com/</a> [16]                      |
| Small Interfering RNA siRNA                                  | ONPATTRO (Patisiran,                            | Double stranded siRNA delivered in lipid nanoparticles and administered intravenously                                                         | For the treatment of hereditary transthyretin-mediated amyloidosis by targeting a sequence within the transthyretin messenger RNA to decrease hepatic production of mutant and wild-type transthyretin                                                                                                      | Alnylam Pharmaceuticals <a href="https://www.onpattro.com/">https://www.onpattro.com/</a> [17]                                     |
|                                                              | GIVLAARI (Givosiran)                            | Double-stranded siRNA that causes degradation of aminolevulinic synthase-1 (ALAS1) mRNA in hepatocytes through RNA interference               | Treatment of adult patients with acute hepatic porphyria. Reduced ALAS-1 mRNA results in reduced levels of neurotoxic intermediates, aminolevulinic acid (ALA) and porphobilinogen (PBG) which are responsible for attacks                                                                                  | Alnylam Pharmaceuticals [18]                                                                                                       |
|                                                              | OXLUMO (Lumasiran)                              | double-stranded siRNA that reduces levels of glycolate oxidase (GO) enzyme by targeting the HAO1                                              | for the treatment of primary hyperoxaluria type 1 (PH1). Decreased GO levels eventually lead to a reduction of urinary and plasma oxalate levels                                                                                                                                                            | Alnylam Pharmaceuticals <a href="https://www.oxlumo.com/">https://www.oxlumo.com/</a> [19]                                         |

| Type of Cell/ Gene Therapy     | DRUG NAME (Year of Approval)                | VECTOR/ MODE OF ACTION                                                                                                                                                                      | INDICATION                                                                                                                                                                                                                                                                   | COMPANY. Ref.                                                                                                                                             |
|--------------------------------|---------------------------------------------|---------------------------------------------------------------------------------------------------------------------------------------------------------------------------------------------|------------------------------------------------------------------------------------------------------------------------------------------------------------------------------------------------------------------------------------------------------------------------------|-----------------------------------------------------------------------------------------------------------------------------------------------------------|
|                                |                                             | mRNA in hepatocytes through RNA interference                                                                                                                                                |                                                                                                                                                                                                                                                                              |                                                                                                                                                           |
|                                | LEQVIO (Inclisiran)                         | double-stranded siRNA that acts by inhibiting translation of liver-produced proprotein convertase, PCSK9.                                                                                   | For the treatment of people with clinical atherosclerotic cardiovascular disease (ASCVD) and heterozygous familial hypercholesterolemia. PCSK9 degradation results in a reduction of lysosomal degradation of LDL receptors, therefore reducing the level of circulating LDL | Novartis Pharmaceuticals [20]                                                                                                                             |
| Adenovirus                     | ADSTILADRIN (nadofaragene firadenovec-vncg) | Non-replicating adenoviral vector-based therapy for the delivery of a copy of gene encoding a human interferon alpha 2b (IFNα2b) to the bladder urothelium                                  | For the treatment of adult patients with high-risk Bacillus Calmette-Guérin (BCG)-unresponsive non-muscle invasive bladder cancer (NMIBC) with carcinoma in situ (CIS) with or without papillary tumors                                                                      | Ferring Pharmaceuticals A/S [21]                                                                                                                          |
| Oncolytic Adenovirus           | GENDICINE rAd-p53 (2003)                    | In vivo administration of Recombinant adenovirus (Ad) vector carrying human wt p53 gene                                                                                                     | Treatment of head and neck squamous-cell carcinoma (HNSCC)                                                                                                                                                                                                                   | Shenzhen SiBiono GeneTech, approved by China FDA <a href="http://www.sibiono.com/en/productinfo.aspx">http://www.sibiono.com/en/productinfo.aspx</a> [22] |
|                                | ONCORINE (China FDA, 2005)                  | Oncolytic adenovirus -genetically modified adenovirus named H101 (E1B-deletion). Administered <i>in vivo</i>                                                                                | Used in conjunction with chemotherapy for the treatment of nasopharyngeal carcinoma and head and neck cancer                                                                                                                                                                 | Shanghai Sunway Biotec, China [23]                                                                                                                        |
| Adeno-Associated Virus Vectors | HEMGENIX (etranacogene dezaparvovec)        | Adeno-Associated Virus 5 vector-based gene therapy                                                                                                                                          | For the treatment of adults with Hemophilia B (congenital Factor IX deficiency) who: Currently use Factor IX prophylaxis therapy, or have current or historical life-threatening hemorrhage, or have repeated, serious spontaneous bleeding episodes.                        | CSL Behring LLC [24]                                                                                                                                      |
|                                | LUXTURNA voretigene neparvovec-rzyl (2017)  | Adeno-Associated Virus vector-based gene therapy                                                                                                                                            | For treatment of patients with confirmed biallelic RPE65 mutation-associated retinal dystrophy. First gene product in USA targeting gene mutations                                                                                                                           | Spark Therapeutics, Inc. <a href="https://luxturna.com/">https://luxturna.com/</a> [25]                                                                   |
|                                | ZOLGENSMA 2019                              | Adeno-Associated Virus vector-based gene therapy                                                                                                                                            | For the treatment of paediatric patients less than 2 years of age with spinal muscular atrophy (SMA) with biallelic mutations in the survival motor neuron 1 (SMN1) gene                                                                                                     | Novartis Gene Therapies, Inc. <a href="https://www.zolgensma.com/">https://www.zolgensma.com/</a> [26]                                                    |
|                                | Roctavian (valoctocogene roxaparvovec-rvox) | Adeno-associated virus serotype 5 (AAV5) based gene therapy vector, that introduces a functional copy of a transgene encoding the B-domain deleted SQ form of human coagulation factor VIII | For the treatment of adults with severe hemophilia A (congenital factor VIII deficiency with factor VIII activity < 1 IU/dL) without pre-existing antibodies to adeno-associated virus serotype 5 detected by an FDA-approved                                                | BioMarin Pharmaceutical Inc. NCT04323098                                                                                                                  |

| Type of Cell/ Gene Therapy | DRUG NAME (Year of Approval)                     | VECTOR/ MODE OF ACTION                                                                                                       | INDICATION                                                                                                                          | COMPANY. Ref.                                                                                       |
|----------------------------|--------------------------------------------------|------------------------------------------------------------------------------------------------------------------------------|-------------------------------------------------------------------------------------------------------------------------------------|-----------------------------------------------------------------------------------------------------|
|                            | Elevidys<br>delandistrogene<br>moxeparvovec-rokl | Adeno-associated virus delivering a gene that codes for a shortened form of dystrophin                                       | test.<br>For the treatment of ambulatory pediatric patients aged 4 through 5 years with Duchenne muscular dystrophy (DMD)           | Sarepta Therapeutics Inc [27]                                                                       |
| Retroviral vector          | REXIN-G<br>(Philippines FDA 2007)                | Retrovector bearing a cytotoxic negative cyclin-G1 construct administered intravenously                                      | For the treatment of sarcoma, osteosarcoma, pancreatic cancer                                                                       | Epeius Biotechnologies [28]                                                                         |
|                            | STRIMVELIS<br>(2016)                             | <i>Ex vivo</i> autologous CD34+ cells transduced with retroviral vector that encodes for the human adenosine deaminase (ADA) | For patients with ADA-SCID who cannot undergo bone-marrow transplant for lack of a suitable, matched, related donor.                | Orchard Therapeutics [29]                                                                           |
| Lentiviral Vector          | LIBMELDY<br>2007                                 | <i>Ex vivo</i> Autologous CD34+ cells genetically modified with lentiviral vector that encodes for ARSA gene                 | For treating children with early onset of metachromatic leukodystrophy (MLD)                                                        | Orchard Therapeutics<br><a href="https://www.libmeldy.eu/">https://www.libmeldy.eu/</a><br>[30, 31] |
|                            | SKYSONA<br>(elivaldogene<br>autotemcel)          | <i>Ex vivo</i> Autologous CD34+ cells genetically modified with lentiviral vector Lenti-D                                    | To slow the progression of neurologic dysfunction in boys 4-17 years of age with early, active cerebral adrenoleukodystrophy (CALD) | Bluebird Bio, Inc.<br>[32]                                                                          |
|                            | ZYNTGLO<br>(betibeglogene<br>autotemcel)<br>2019 | Autologous, lentiviral <i>ex vivo</i> hematopoietic stem cell-based gene therapy                                             | For treatment of adult and paediatric patients with $\beta$ -thalassemia who require regular red blood cell (RBC) transfusions      | Bluebird Bio Inc.<br><a href="https://www.zynteglo.com/">https://www.zynteglo.com/</a><br>[33]      |

**Table S2: *Ex vivo* and *In vivo* HIV Cell and Gene Therapy Clinical Trials; Source: <https://clinicaltrials.gov>**

| Interventions                                                                           | NCT Number; Other ID                 | Cells Modified | Title                                                                                                                                                                                                | Status                  | Sponsor/ Collaborators                        | Study Designs                                                               | Study Results           |
|-----------------------------------------------------------------------------------------|--------------------------------------|----------------|------------------------------------------------------------------------------------------------------------------------------------------------------------------------------------------------------|-------------------------|-----------------------------------------------|-----------------------------------------------------------------------------|-------------------------|
| <b>CELL THERAPY</b>                                                                     |                                      |                |                                                                                                                                                                                                      |                         |                                               |                                                                             |                         |
| *GCSF Mobilized Allogeneic PBSC Cultured w/Cytokines; Transduced w/RV                   | NCT00005785; 9901671 DK-0167         | 99- CD34 HSPC  | Stem Cell (Modified Bone Marrow) Transplantation in HIV-Infected Patients With Blood Cancer                                                                                                          | Completed Sep 1 1999    | NIDDK; NIHCC                                  | Phase1- Primary Purpose: Treatment                                          | No Results posted       |
| *NeoR gene delivered via retroviral vectors. Genetically Marked Syngeneic T Lymphocytes | NCT00001353; 9301101 0110            | 93-I- CD4      | Safety and Survival of Genetically Modified White Blood Cells in HIV-Infected Persons - A Study in Identical Twin Pairs                                                                              | Completed Mar 1 2002    | NIAID; NIHCC                                  |                                                                             | No Results posted [175] |
| *Syngeneic Lymphocytes (CD4+) Cultured with OKT3 (Ortho) and Interleukin-2 (Chiro)      | NCT00001535; 9600511 HG-0051         | 96- CD4        | Twins Study of Gene Therapy for HIV Infection                                                                                                                                                        | Completed Mar 1 2002    | NHGRI; NIHCC                                  | Phase1- Primary Purpose: Treatment                                          | No Results posted       |
| WT-gag-TCR modified T cells or $\alpha/6$ -gag-TCR modified T cells                     | NCT00991224; 810108                  | CD8 (SL9 TCR)  | Redirected High Affinity Gag-Specific Autologous T Cells for HIV Gene Therapy                                                                                                                        | Completed Jan 1 2014    | University of Pennsylvania; Adaptimmune       | Phase1- Interventional: Non-Randomized; Factorial Assignment; Masking: None | No Results posted       |
| AGT103-T-LTFU                                                                           | NCT05529342; AGT103-T-LTFU           | CD4            | Long-term Follow-up of Study Participant Treated With Lentiviral-Based Genetically Modified Autologous Cell Product, AGT103-T                                                                        | Enrolling by invitation | American Gene Technologies International Inc. | Observational: Prospective, Case-Control                                    | No Results posted       |
| (AGT103-T): Antiretroviral Therapy Interruption (ATI)                                   | NCT05540964; AGT-HC-169              | CD4            | An Antiretroviral Treatment Interruption (ATI) Study to Evaluate the Impact of Genetically Modified Autologous Cells (AGT103-T) to Suppress HIV Replication in the Absence of Antiretroviral Therapy | Enrolling by invitation | American Gene Technologies International Inc. | Observational: Case-Control, Prospective                                    | No Results posted       |
| AGT103-T                                                                                | NCT04561258; AGT-HC168. NCT03215004. | CD4            | Study to Evaluate the Safety of a Gene and Cell Therapy Product in Participants with HIV That is Well-Controlled on Antiretroviral Therapy                                                           | Recruiting              | American Gene Technologies International Inc. | Phase1 -Interventional: Non-Randomized;Parallel Assignment; Masking: None   | Initial results [173]   |

| Interventions                                                                                                                  | NCT Number; Other ID                      | Cells Modified    | Title                                                                                                                                       | Status                  | Sponsor/ Collaborators          | Study Designs                                                                                | Study Results            |
|--------------------------------------------------------------------------------------------------------------------------------|-------------------------------------------|-------------------|---------------------------------------------------------------------------------------------------------------------------------------------|-------------------------|---------------------------------|----------------------------------------------------------------------------------------------|--------------------------|
| SB-728: ZFN modified T cells                                                                                                   | NCT00842634; 806383                       | CD4               | Autologous T-Cells Genetically Modified at the CCR5 Gene by Zinc Finger Nucleases SB-728 for HIV                                            | Completed Jan 13 2013   | University of Pennsylvania; ST  | Phase1- Interventional: Non-Randomized; Parallel Assignment; Masking: None                   | No Results posted        |
| Genetic: SB-728-T                                                                                                              | NCT01044654; SB-728-0902                  | CD4               | Phase 1 Dose Escalation Study of Autologous T-cells Genetically Modified at the CCR5 Gene by Zinc Finger Nucleases in HIV-Infected Patients | Completed Dec 1 2014    | Sangamo Therapeutics            | Phase1- Interventional: Non-Randomized Single Group Assignment; Masking: None                | No Results posted        |
| SB-728-T                                                                                                                       | NCT01252641; SB-728-1002                  | CD4               | Study of Autologous T-cells Genetically Modified at the CCR5 Gene by Zinc Finger Nucleases in HIV-Infected Subjects                         | Completed May 1 2015    | ST                              | Phase 1/2- Interventional: Single Group Assignment; Masking: None                            | No Results posted        |
| SB-728mR-T Drug: Cyclophosphamide                                                                                              | NCT02225665; SB-728mR-1401<br>NCT02388594 | CD4               | Repeat Doses of SB-728mR-T After Cyclophosphamide Conditioning in HIV-Infected Subjects on HAART                                            | Completed Jun 1 2018    | ST                              | Phase 1/2- Interventional: Non-Randomized; Single Group Assignment; Masking: None            | Has Results; [174]       |
| SB-728mR-HSPC Infusion 3 days following busulfan conditioning                                                                  | NCT02500849; 14017                        | CD34 HSPC         | Safety Study of Zinc Finger Nuclease CCR5-modified Hematopoietic Stem/Progenitor Cells in HIV-1 Infected Patients                           | Active, not recruiting  | City of Hope MC; ST; CIRM       | Phase1- Interventional: Non-Randomized; Single Group Assignment; No Masking                  | No Results posted        |
| SB-728-T: Expanded unmodified autologous CD4+ T cells                                                                          | NCT03666871; TRAILBLAZER                  | CD4               | CCR5-modified CD4+ T Cells for HIV Infection                                                                                                | Active, not recruiting  | Univ. of Cincinnati; UCSF; CWRU | Interventional: Randomized; Parallel Assignment; Masking: Double (Participant, Investigator) | No Results posted        |
| *SB-728-T or SB-728mR-T                                                                                                        | NCT04201782; SB-728-1003                  | CD34 HSPC and CD4 | Long-term Follow-up of HIV Subjects Exposed to SB-728-T or SB-728mR-T                                                                       | Enrolling by invitation | ST                              | Observational: Cohort; Prospective                                                           | No Results posted        |
| Autologous CD4+ T cells genetically modified with a retroviral vector expressing MazF endoribonuclease gene (MazF-T), given IV | NCT01787994; 815441                       | CD4               | Redirected MazF-CD4 Autologous T Cells for HIV Gene Therapy                                                                                 | Completed Jul 1 2017    | University of Pennsylvania      | Phase1- Interventional: Non-Randomized; Parallel Assignment; Masking: None                   | No Results posted. [178] |

| Interventions                                                   | NCT Number; Other ID                    | Cells Modified       | Title                                                                                                                                                                         | Status                 | Sponsor/ Collaborators                                                    | Study Designs                                                                                        | Study Results            |
|-----------------------------------------------------------------|-----------------------------------------|----------------------|-------------------------------------------------------------------------------------------------------------------------------------------------------------------------------|------------------------|---------------------------------------------------------------------------|------------------------------------------------------------------------------------------------------|--------------------------|
| *CD4-ZETA Gene Modified T Cells                                 | NCT01013415; WU #8829-99                | CD4                  | CD4-ZETA Gene Modified T Cells With and Without Exogenous Interleukin-2 (IL-2) In HIV Patients                                                                                | Completed Aug 1 2021   | University of Pennsylvania                                                | Phase1- Interventional: Non-Randomized; Parallel Assignment; Masking: None                           | No Results posted. [172] |
| Genetic: CCR5 gene modification                                 | NCT03164135; 307-HSPC-R5                | CD34 HSPC            | Safety of Transplantation of CRISPR CCR5 Modified CD34+ Cells in HIV-infected Subjects With Hematological Malignances                                                         | Completed May 20 2021  | Academy of Military Medical Sciences; Peking Univ.; Capital Medical Univ. | Phase, N/A - Interventional: Single Group Assignment; Masking: None                                  | No Results posted        |
| CD4 CAR+CCR5 ZFN T-cells                                        | NCT03617198; 831464                     | CD4                  | CD4 CAR+ ZFN-modified T Cells in HIV Therapy                                                                                                                                  | Active, not recruiting | University of Pennsylvania                                                | Phase 1- Interventional: Randomized; Parallel Assignment; Masking: None                              | No Results posted        |
| LVgp120duoCAR-T cells, low dose and high dose; Cyclophosphamide | NCT04648046; 20-31976                   | CD4                  | CAR-T Cells for HIV Infection                                                                                                                                                 | Recruiting             | Steven Deeks; Caring Cross; UCSF                                          | Phase 1/2-Interventional: Non-Randomized; Sequential Assignment; Masking- None                       | No Results posted        |
|                                                                 | NCT04799483; 020080102-I-0080           | CD4                  | Safety and Survival of Genetically Modified White Blood Cells in HIV-infected Twins The Gemini Study                                                                          | Active, not recruiting | NIAID; NIHCC                                                              | Observational: Cohort; Prospective                                                                   | No Results posted        |
| GENE THERAPY                                                    |                                         |                      |                                                                                                                                                                               |                        |                                                                           |                                                                                                      |                          |
| Retrovirus carrying multiple ribozymes                          | NCT00002221; STUDY 2                    | Peripheral blood HSC | Gene Therapy in HIV-Positive Patients With Non-Hodgkin's Lymphoma                                                                                                             | Completed June 24 2005 | Ribozyme; NIH AIDS CTIS                                                   | Phase2: Primary Purpose: Treatment                                                                   | No Results posted        |
| RevM10 gene, RevM10/polAS gene                                  | NCT00003942; CDR0000067135 SYSTEMIX-105 | CD34 HSPC            | Gene Therapy, Chemotherapy, and Peripheral Stem Cell Transplantation in Treating Patients With HIV-Related Non-Hodgkin's Lymphoma                                             | Unknown status         | Systemix; NCI                                                             | Phase 1/2- Primary Purpose: Treatment                                                                | No Results posted        |
| OZ1 transduced CD34+ cells                                      | NCT00074997; CR010783 OZ1-HV1-201       | CD34 HSPC            | An Efficacy and Safety Study of Autologous CD34+ Hematopoietic Progenitor Cells Transduced With Placebo or an Anti- HIV 1 Ribozyme (OZ1) in Participants With HIV-1 Infection | Completed Jan 1 2008   | Janssen-Cilag Pty Ltd                                                     | Phase2- Interventional: Randomized; Parallel Assignment; Masking: Double (Participant, Investigator) | No results posted [180]  |

| Interventions                                                                                     | NCT Number; Other ID                           | Cells Modified    | Title                                                                                                                                                     | Status                 | Sponsor/ Collaborators                    | Study Designs                                                                 | Study Results     |
|---------------------------------------------------------------------------------------------------|------------------------------------------------|-------------------|-----------------------------------------------------------------------------------------------------------------------------------------------------------|------------------------|-------------------------------------------|-------------------------------------------------------------------------------|-------------------|
| *Genetic: OZ1 transduced cells                                                                    | NCT01177059; CR016027 OZ1-HV1-202              | CD34 HSPC         | Long Term Follow-Up Study of Human Immunodeficiency Virus Type 1 (HIV-1) Positive Patients Who Have Received OZ1 Gene Therapy as Part of a Clinical Trial | Completed Nov 30 2017  | Janssen-Cilag Pty Ltd                     | Phase2- Interventional: Single Group Assignment; Masking: None                | Has results       |
| C46/CCR5/P140K Lentiviral Vector-transduced Autologous HSPCs administered with cytotoxics         | NCT02343666; 2673.00 NCI-2014-02395  2673      | CD34 HSPC         | HIV-Resistant Gene Modified Stem Cells and Chemotherapy in Treating Patients With Lymphoma With HIV Infection                                             | Withdrawn              | Fred Hutchinson Cancer Center; NCI; NHLBI | Phase1- Interventional: Single Group Assignment; Masking: None                | No Results posted |
| Cal-1 modified HSPC and CD4+ T cells with Busulfan conditioning                                   | NCT01734850; CAL-USA-11                        |                   | Safety Study of a Dual Anti-HIV Gene Transfer Construct to Treat HIV-1 Infection                                                                          | Completed Nov 1 2017   | Calimmune, Inc.                           | Phase 1/2- Interventional: Non-Randomized; Parallel Assignment; Masking: None | Has results       |
| Cal-1 (LVsh5/C46)                                                                                 | NCT03593187; P141004 2015-004453-41            | CD34 HSPC and CD4 | A Study Evaluating the Safety of Cal-1 (LVsh5/C46) Drug Product in HIV-1 Infected Patient With High Risk Lymphoma                                         | Completed Jul 28 2020  | APHP, CSL Behring                         | Phase 1/2- Interventional: Single Group Assignment; Masking: None             | No Results posted |
| *Cal-1 (LVsh5/C46)- LTFU                                                                          | NCT02390297; CAL-INT-00                        | CD34 HSPC and CD4 | Long Term Follow up for the Detection of Delayed Adverse Events in Cal-1 Recipients                                                                       | Active, not recruiting | Calimmune, Inc.                           | Observational Model: Prospective                                              | No Results posted |
| LV vector rHIV7-shI-TAR-CCR5RZ-transduced HSPC given with several cytotoxic agents                | NCT00569985; 04047 CHNMC-04047 NCI-2012-00437  | CD34 HSPC         | Gene Therapy-Treated Stem Cells in Treating Patients Undergoing Stem Cell Transplant for Intermediate-Grade or High-Grade AIDS-Related Lymphoma           | Completed Nov 12 2019  | City of Hope Medical Center; NCI          | Phase1- Interventional: Single Group Assignment; Masking: None                | No Results posted |
| Busulfan; lentivirus vector rHIV7-shI-TAR-CCR5RZ-transduced HSPC                                  | NCT01961063; 13282 NCI-2013-01728              | CD34 HSPC         | Gene Therapy After Frontline Chemotherapy in Treating Patients With AIDS-Related Non-Hodgkin Lymphoma                                                     | Active, not recruiting | City of Hope Medical Center               | Phase1- Intervention Model: Single Group Assignment; Masking: None            | No Results posted |
| LV Vector rHIV7-shI-TAR-CCR5RZ-transduced HSPC with Prednisone, Rituximab, and several cytotoxics | NCT02337985; 14004 NCI-2014-02416  U01CA183012 | CD34 HSPC         | Gene Therapy and Combination Chemotherapy in Treating Patients With AIDS-Related Non-Hodgkin Lymphoma                                                     | Active, not recruiting | City of Hope Medical Center; NCI          | Phase1- Interventional: Single Group Assignment; Masking: None                | No Results posted |

| Interventions                                                              | NCT Number; Other ID                          | Cells Modified | Title                                                                                                                                                                                   | Status                        | Sponsor/ Collaborators                                               | Study Designs                                                                  | Study Results             |
|----------------------------------------------------------------------------|-----------------------------------------------|----------------|-----------------------------------------------------------------------------------------------------------------------------------------------------------------------------------------|-------------------------------|----------------------------------------------------------------------|--------------------------------------------------------------------------------|---------------------------|
| CRISPR/Cas9 CCR5 Gene Modification – Nucleofection                         | NCT03164135<br>307-HSPC-R5                    | CD34<br>HSPC   | Safety and Feasibility Study of Allotransplantation of CRISPR/Cas9 CCR5 Gene Modified CD34+ Hematopoietic Stem/Progenitor Cells in HIV-infected Subjects With Hematological Malignances | Unknown                       | Affiliated Hospital to Academy of Military Medical Sciences, Beijing | Interventional: Single group Assignment                                        | Result in 1 patient [192] |
| pHIV7-shI-TAR-CCR5RZ treated CD4 cells                                     | NCT01153646; 03161   IND #14146               | CD4            | Gene Transfer for HIV Using Autologous T Cells                                                                                                                                          | Terminated Jan 1 2011         | City of Hope Medical Center                                          | Phase1- Interventional: Single Group Assignment; Masking: None                 | No Results posted         |
| VRX496-transduced autologous CD4 T cells                                   | NCT00622232; VRX496-USA-05-002-Rollover       | CD4            | A Rollover Study for Subjects Who Completed Participation in the VRX496-USA-05-002 Trial                                                                                                | Active, not recruiting        | VIRxSYS Corporation                                                  | Phase2: Interventional: Non-Randomized; Single Group Assignment; Masking: None | No Results posted [182]   |
| VRX496-Modified Autologous T cells (Lexgenleucel-T)                        | NCT00131560; VRX496-USA-05-002<br>NCT00295477 | CD4            | Safety and Efficacy of T Cell Genetic Immunotherapy for HIV                                                                                                                             | Active, not recruiting        | VIRxSYS Corporation                                                  | Phase2- Interventional: Non-Randomized; Single Group Assignment; No Masking    | No Results posted         |
| LV vector CCR5 shRNA/TRIM5alpha/ TAR Decoy-transduced Autologous CD34 HSPC | NCT02797470; AMC-097   NCI-2015-01745         | CD34<br>HSPC   | Gene Therapy in Treating Patients With Human Immunodeficiency Virus-Related Lymphoma Receiving Stem Cell Transplant                                                                     | Recruiting                    | AIDS Malignancy Consortium; NCI; CIRM                                | Phase 1/2- Interventional: Single Group Assignment; Masking: None              | No Results posted         |
| shRNA-modified CD34+ cells with Low dose busulfan preconditioning          | NCT03517631; KL1702                           | CD34<br>HSPC   | An Efficacy and Safety Study of shRNA-modified CD34+ Cells in HIV-infected Patients.                                                                                                    | Unknown status<br>Dec 31 2020 | SPHCC; R&D Kanglin Biotech                                           | Phase1- Interventional: Non-Randomized; Parallel Assignment; Masking: None     | No Results posted         |

IN-VIVO STUDIES

| Interventions                                | NCT Number; Other ID                                                                                             | Cells Modified | Title                                                                                                                                                                                                                   | Status     | Sponsor/ Collaborators   | Study Designs                                                                        | Study Results                                                                                      |
|----------------------------------------------|------------------------------------------------------------------------------------------------------------------|----------------|-------------------------------------------------------------------------------------------------------------------------------------------------------------------------------------------------------------------------|------------|--------------------------|--------------------------------------------------------------------------------------|----------------------------------------------------------------------------------------------------|
| Leronlimab – CCR5 Antagonist                 | NCT02859961 (Others - NCT00642707, NCT02175680, NCT02355184, NCT02483078, NCT02990858, NCT03902522, NCT05271370) |                | A Phase 2b/3, Multicenter Study to Assess the Treatment Strategy of Using PRO 140 SC as Long-Acting Single-Agent Maintenance Therapy for 48 Weeks in Virologically Suppressed Subjects With CCR5-tropic HIV-1 Infection | Unknown    | CytoDyn Inc              | Interventional – Treatment Open label, Randomized, Parallel Assignment               | Initial results – product safe (mild side effects and efficacious at higher doses of 525 and 700mg |
| EBT-101 CRISPR-Cas9 delivered via AAV vector | NCT05144386                                                                                                      |                | Study of EBT-101 in Aviremic HIV-1 Infected Adults on Stable ART to evaluate the safety, tolerability, biodistribution and pharmacodynamics                                                                             | Recruiting | Excision BioTherapeutics | Open-label, multi-center, single ascending dose study Phase 1 – First in Human Trial | Initial results - no serious adverse events                                                        |

\*These studies could enrol children

Assistance Publique -Hopitaux de Paris; (APHP)  
California Institute for Regenerative Medicine (CIRM)  
Case Western Reserve University (CWRU)  
CTIS: Clinical Trials Information Service  
National Cancer Institute (NCI)  
National Heart, Lung, and Blood Institute (NHLBI)  
National Human Genome Research Institute (NHGRI)

National Institute of Allergy and Infectious Diseases (NIAID)  
National Institute of Diabetes and Digestive and Kidney Diseases (NIDDK)  
National Institutes of Health Clinical Center (NIHCC)  
Sangamo Therapeutics (ST)  
Shanghai Public Health Clinical Center (SPHCC);  
University of California San Francisco (UCSF)

## References

1. Munshi, N.C.; Anderson, L.D.; Shah, N.; Madduri, D.; Berdeja, J.; Lonial, S.; Raje, N.; Lin, Y.; Siegel, D.; Oriol, A.; et al. Idecabtagene Vicleucel in Relapsed and Refractory Multiple Myeloma. *N. Engl. J. Med.* **2021**, *384*, 705–716. <https://doi.org/10.1056/NEJMoa2024850>.
2. Berdeja, J.G.; Madduri, D.; Usmani, S.Z.; Jakubowiak, A.; Agha, M.; Cohen, A.D.; Stewart, A.K.; Hari, P.; Htut, M.; Lesokhin, A.; et al. Ciltacabtagene autoleucel, a B-cell maturation antigen-directed chimeric antigen receptor T-cell therapy in patients with relapsed or refractory multiple myeloma (CARTITUDE-1): A phase 1b/2 open-label study. *Lancet* **2021**, *398*, 314–324. [https://doi.org/10.1016/S0140-6736\(21\)00933-8](https://doi.org/10.1016/S0140-6736(21)00933-8).
3. Abramson, J.S.; Palomba, M.L.; Gordon, L.I.; Lunning, M.A.; Wang, M.; Arnason, J.; Mehta, A.; Purev, E.; Maloney, D.G.; Andreadis, C.; et al. Lisocabtagene maraleucel for patients with relapsed or refractory large B-cell lymphomas (TRANSCEND NHL 001): A multicentre seamless design study. *Lancet* **2020**, *396*, 839–852. [https://doi.org/10.1016/S0140-6736\(20\)31366-0](https://doi.org/10.1016/S0140-6736(20)31366-0).
4. Schuster, S.J.; Bishop, M.R.; Tam, C.S.; Waller, E.K.; Borchmann, P.; McGuirk, J.P.; Jäger, U.; Jaglowski, S.; Andreadis, C.; Westin, J.R.; et al. Tisagenlecleucel in Adult Relapsed or Refractory Diffuse Large B-Cell Lymphoma. *N. Engl. J. Med.* **2018**, *380*, 45–56. <https://doi.org/10.1056/NEJMoa1804980>.
5. Wang, M.; Munoz, J.; Goy, A.; Locke, F.L.; Jacobson, C.A.; Hill, B.T.; Timmerman, J.M.; Holmes, H.; Jaglowski, S.; Flinn, I.W.; et al. KTE-X19 CAR T-Cell Therapy in Relapsed or Refractory Mantle-Cell Lymphoma. *N. Engl. J. Med.* **2020**, *382*, 1331–1342. <https://doi.org/10.1056/NEJMoa1914347>.
6. Neelapu, S.S.; Locke, F.L.; Bartlett, N.L.; Lekakis, L.J.; Miklos, D.B.; Jacobson, C.A.; Braunschweig, I.; Oluwole, O.O.; Siddiqi, T.; Lin, Y.; et al. Axicabtagene Ciloleucel CAR T-Cell Therapy in Refractory Large B-Cell Lymphoma. *N. Engl. J. Med.* **2017**, *377*, 2531–2544. <https://doi.org/10.1056/NEJMoa1707447>.
7. Kantoff, P.W.; Higano, C.S.; Shore, N.D.; Berger, E.R.; Small, E.J.; Penson, D.F.; Redfern, C.H.; Ferrari, A.C.; Dreicer, R.; Sims, R.B.; et al. Sipuleucel-T Immunotherapy for Castration-Resistant Prostate Cancer. *N. Engl. J. Med.* **2010**, *363*, 411–422. <https://doi.org/10.1056/NEJMoa1001294>.
8. Richardson, P.G.; Riches, M.L.; Kernan, N.A.; Brochstein, J.A.; Mineishi, S.; Termuhlen, A.M.; Arai, S.; Grupp, S.A.; Guinan, E.C.; Martin, P.L.; et al. Phase 3 trial of defibrotide for the treatment of severe veno-occlusive disease and multi-organ failure. *Blood* **2016**, *127*, 1656–1665. <https://doi.org/10.1182/blood-2015-10-676924>.
9. Kernan, N.A.; Grupp, S.; Smith, A.R.; Arai, S.; Triplett, B.; Antin, J.H.; Lehmann, L.; Shore, T.; Ho, V.T.; Bunin, N.; et al. Final results from a defibrotide treatment-IND study for patients with hepatic veno-occlusive disease/sinusoidal obstruction syndrome. *Br. J. Haematol.* **2018**, *181*, 816–827. <https://doi.org/10.1111/bjh.15267>.
10. Lim, K.R.; Maruyama, R.; Yokota, T. Eteplirsen in the treatment of Duchenne muscular dystrophy. *Drug Des. Devel. Ther.* **2017**, *11*, 533–545. <https://doi.org/10.2147/dddt.S97635>.
11. Wong, E.; Goldberg, T. Mipomersen (kynamro): A novel antisense oligonucleotide inhibitor for the management of homozygous familial hypercholesterolemia. *Pharm. Ther.* **2014**, *39*, 119–122.
12. Finkel, R.S.; Chiriboga, C.A.; Vajsaar, J.; Day, J.W.; Montes, J.; De Vivo, D.C.; Yamashita, M.; Rigo, F.; Hung, G.; Schneider, E.; et al. Treatment of infantile-onset spinal muscular atrophy with nusinersen: A phase 2, open-label, dose-escalation study. *Lancet* **2016**, *388*, 3017–3026. [https://doi.org/10.1016/s0140-6736\(16\)31408-8](https://doi.org/10.1016/s0140-6736(16)31408-8).
13. Mercuri, E.; Darras, B.T.; Chiriboga, C.A.; Day, J.W.; Campbell, C.; Connolly, A.M.; Iannaccone, S.T.; Kirschner, J.; Kuntz, N.L.; Saito, K.; et al. Nusinersen versus Sham Control in Later-Onset Spinal Muscular Atrophy. *N. Engl. J. Med.* **2018**, *378*, 625–635. <https://doi.org/10.1056/NEJMoa1710504>.
14. Gragoudas, E.S.; Adamis, A.P.; Cunningham, E.T.; Feinsod, M.; Guyer, D.R. Pegaptanib for Neovascular Age-Related Macular Degeneration. *N. Engl. J. Med.* **2004**, *351*, 2805–2816. <https://doi.org/10.1056/NEJMoa042760>.
15. Deev, R.V.; Bozo, I.Y.; Mzhavanadze, N.D.; Voronov, D.A.; Gavrilenko, A.V.; Chervyakov, Y.V.; Staroverov, I.N.; Kalinin, R.E.; Shvalb, P.G.; Isaev, A.A. pCMV-vegfl65 Intramuscular Gene Transfer is an Effective Method of Treatment for Patients With Chronic Lower Limb Ischemia. *J. Cardiovasc. Pharmacol. Ther.* **2015**, *20*, 473–482. <https://doi.org/10.1177/1074248415574336>.
16. Andtbacka, R.H.; Kaufman, H.L.; Collichio, F.; Amatruda, T.; Senzer, N.; Chesney, J.; Delman, K.A.; Spitler, L.E.; Puzanov, I.; Agarwala, S.S.; et al. Talimogene Laherparepvec Improves Durable Response Rate in Patients With Advanced Melanoma. *J. Clin. Oncol.* **2015**, *33*, 2780–2788. <https://doi.org/10.1200/jco.2014.58.3377>.

17. Adams, D.; Gonzalez-Duarte, A.; O'Riordan, W.D.; Yang, C.-C.; Ueda, M.; Kristen, A.V.; Tournev, I.; Schmidt, H.H.; Coelho, T.; Berk, J.L.; et al. Patisiran, an RNAi Therapeutic, for Hereditary Transthyretin Amyloidosis. *N. Engl. J. Med.* **2018**, *379*, 11–21. <https://doi.org/10.1056/NEJMoa1716153>.
18. Balwani, M.; Sardh, E.; Ventura, P.; Peiró, P.A.; Rees, D.C.; Stölzel, U.; Bissell, D.M.; Bonkovsky, H.L.; Windyga, J.; Anderson, K.E.; et al. Phase 3 Trial of RNAi Therapeutic Givosiran for Acute Intermittent Porphyria. *N. Engl. J. Med.* **2020**, *382*, 2289–2301. <https://doi.org/10.1056/NEJMoa1913147>.
19. Garrelfs, S.F.; Frishberg, Y.; Hulton, S.A.; Koren, M.J.; O'Riordan, W.D.; Cochat, P.; Deschênes, G.; Shasha-Lavsky, H.; Saland, J.M.; van't Hoff, W.G.; et al. Lumasiran, an RNAi Therapeutic for Primary Hyperoxaluria Type 1. *N. Engl. J. Med.* **2021**, *384*, 1216–1226. <https://doi.org/10.1056/NEJMoa2021712>.
20. Ray, K.K.; Wright, R.S.; Kallend, D.; Koenig, W.; Leiter, L.A.; Raal, F.J.; Bisch, J.A.; Richardson, T.; Jaros, M.; Wijngaard, P.L.J.; et al. Two Phase 3 Trials of Inclisiran in Patients with Elevated LDL Cholesterol. *N. Engl. J. Med.* **2020**, *382*, 1507–1519. <https://doi.org/10.1056/NEJMoa1912387>.
21. Boorjian, S.A.; Alemozaffar, M.; Konety, B.R.; Shore, N.D.; Gomella, L.G.; Kamat, A.M.; Bivalacqua, T.J.; Montgomery, J.S.; Lerner, S.P.; Busby, J.E.; et al. Intravesical nadofaragene firadenovec gene therapy for BCG-unresponsive non-muscle-invasive bladder cancer: A single-arm, open-label, repeat-dose clinical trial. *Lancet Oncol.* **2021**, *22*, 107–117. [https://doi.org/10.1016/s1470-2045\(20\)30540-4](https://doi.org/10.1016/s1470-2045(20)30540-4).
22. Zhang, S.; Xiao, S.; Sun, Y.; Liu, C.; Su, X.; Li, D.; Xu, G.; Zhu, G.; Xu, B. Clinical Trial of Recombinant Adenovirus-p53 (Gendicine) Combined with Radiotherapy in Nasopharyngeal Carcinoma Patients. *Mol. Ther.* **2006**, *13*, S280. <https://doi.org/10.1016/j.ymthe.2006.08.806>.
23. Liang, M. Oncorine, the World First Oncolytic Virus Medicine and its Update in China. *Curr. Cancer Drug Targets* **2018**, *18*, 171–176. <https://doi.org/10.2174/1568009618666171129221503>.
24. Pipe, S.W.; Recht, M.; Key, N.S.; Leebeek, F.W.G.; Castaman, G.; Lattimore, S.U.; Van Der Valk, P.; Peerlinck, K.; Coppens, M.; O'Connell, N.; et al. First Data from the Phase 3 HOPE-B Gene Therapy Trial: Efficacy and Safety of Etranacogene Dezaparvovec (AAV5-Padua hFIX variant; AMT-061) in Adults with Severe or Moderate-Severe Hemophilia B Treated Irrespective of Pre-Existing Anti-Capsid Neutralizing Antibodies. *Blood* **2020**, *136*, LBA-6. <https://doi.org/10.1182/blood-2020-143560>.
25. Russell, S.; Bennett, J.; Wellman, J.A.; Chung, D.C.; Yu, Z.-F.; Tillman, A.; Wittes, J.; Pappas, J.; Elci, O.; McCague, S.; et al. Efficacy and safety of voretigene neparvovec (AAV2-hRPE65v2) in patients with RPE65 mediated inherited retinal dystrophy: A randomised, controlled, open-label, phase 3 trial. *Lancet* **2017**, *390*, 849–860. [https://doi.org/10.1016/S0140-6736\(17\)31868-8](https://doi.org/10.1016/S0140-6736(17)31868-8).
26. Day, J.W.; Finkel, R.S.; Chiriboga, C.A.; Connolly, A.M.; Crawford, T.O.; Darras, B.T.; Iannaccone, S.T.; Kuntz, N.L.; Peña, L.D.M.; Shieh, P.B.; et al. Onasemnogene abeparvovec gene therapy for symptomatic infantile-onset spinal muscular atrophy in patients with two copies of SMN2 (STRIVE): An open-label, single-arm, multicentre, phase 3 trial. *Lancet Neurol.* **2021**, *20*, 284–293. [https://doi.org/10.1016/S1474-4422\(21\)00001-6](https://doi.org/10.1016/S1474-4422(21)00001-6).
27. Mendell, J.R.; Shieh, P.B.; McDonald, C.M.; Sahenk, Z.; Lehman, K.J.; Lowes, L.P.; Reash, N.F.; Iammarino, M.A.; Alfano, L.N.; Sabo, B.; et al. Expression of SRP-9001 dystrophin and stabilization of motor function up to 2 years post-treatment with delandistrogene moxeparvovec gene therapy in individuals with Duchenne muscular dystrophy. *Front. Cell Dev. Biol.* **2023**, *11*, 1167762. <https://doi.org/10.3389/fcell.2023.1167762>.
28. Chawla, S.P.; Chua, V.S.; Fernandez, L.; Quon, D.; Blackwelder, W.C.; Gordon, E.M.; Hall, F.L. Advanced Phase I/II Studies of Targeted Gene Delivery In Vivo: Intravenous Rexin-G for Gemcitabine-resistant Metastatic Pancreatic Cancer. *Mol. Ther.* **2010**, *18*, 435–441. <https://doi.org/10.1038/mt.2009.228>.
29. Aiuti, A.; Roncarolo, M.G.; Naldini, L. Gene therapy for ADA-SCID, the first marketing approval of an ex vivo gene therapy in Europe: Paving the road for the next generation of advanced therapy medicinal products. *EMBO Mol. Med.* **2017**, *9*, 737–740. <https://doi.org/10.15252/emmm.201707573>.
30. Biffi, A.; Montini, E.; Lorioli, L.; Cesani, M.; Fumagalli, F.; Plati, T.; Baldoli, C.; Martino, S.; Calabria, A.; Canale, S.; et al. Lentiviral hematopoietic stem cell gene therapy benefits metachromatic leukodystrophy. *Science* **2013**, *341*, 1233158. <https://doi.org/10.1126/science.1233158>.
31. Fumagalli, F.; Calbi, V.; Natali Sora, M.G.; Sessa, M.; Baldoli, C.; Rancoita, P.M.V.; Ciotti, F.; Sarzana, M.; Fraschini, M.; Zambon, A.A.; et al. Lentiviral haematopoietic stem-cell gene therapy for early-onset metachromatic leukodystrophy: Long-term results from a non-randomised, open-label, phase 1/2 trial and expanded access. *Lancet* **2022**, *399*, 372–383. [https://doi.org/10.1016/S0140-6736\(21\)02017-1](https://doi.org/10.1016/S0140-6736(21)02017-1).
32. Eichler, F.; Duncan, C.; Musolino, P.L.; Orchard, P.J.; De Oliveira, S.; Thrasher, A.J.; Armant, M.; Dansereau, C.; Lund, T.C.; Miller, W.P.; et al. Hematopoietic Stem-Cell Gene Therapy for Cerebral Adrenoleukodystrophy. *N. Engl. J. Med.* **2017**, *377*, 1630–1638. <https://doi.org/10.1056/NEJMoa1700554>.

33. Thompson, A.A.; Walters, M.C.; Kwiatkowski, J.; Rasko, J.E.J.; Ribeil, J.-A.; Hongeng, S.; Magrin, E.; Schiller, G.J.; Payen, E.; Semeraro, M.; et al. Gene Therapy in Patients with Transfusion-Dependent  $\beta$ -Thalassemia. *N. Engl. J. Med.* **2018**, *378*, 1479–1493. <https://doi.org/10.1056/NEJMoa1705342>.
